# Supplementary material for: Imbalanced cellular metabolism compromises cartilage homeostasis and joint function in a mouse model of mucolipidosis type III gamma
Source: Oxford University Press journal article supplement (doi:10.1242/dmm.046425), 2020-10-06
Supplement: dmm046425supp.pdf [file dmm046425supp.pdf]

## Supplementary Information

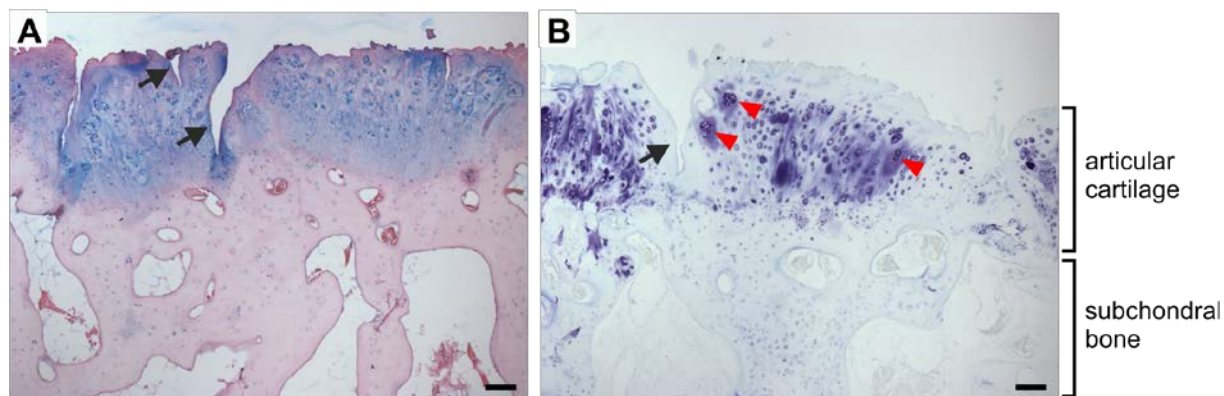

**Fig. S1. Histology analysis of an MLIII gamma patient's femur head reveals cartilage degeneration.** (A) Alcian blue/Haematoxylin/Eosin and (B) toluidine blue staining of paraffin-embedded sections from a femur head of Patient 9 (at the age of 43 years) diagnosed with MLIII gamma. Sites of cartilage erosion (clefts) are indicated with black arrows. Red arrowheads indicate clusters of chondrocytes. Scale bar: 100  $\mu$ m.

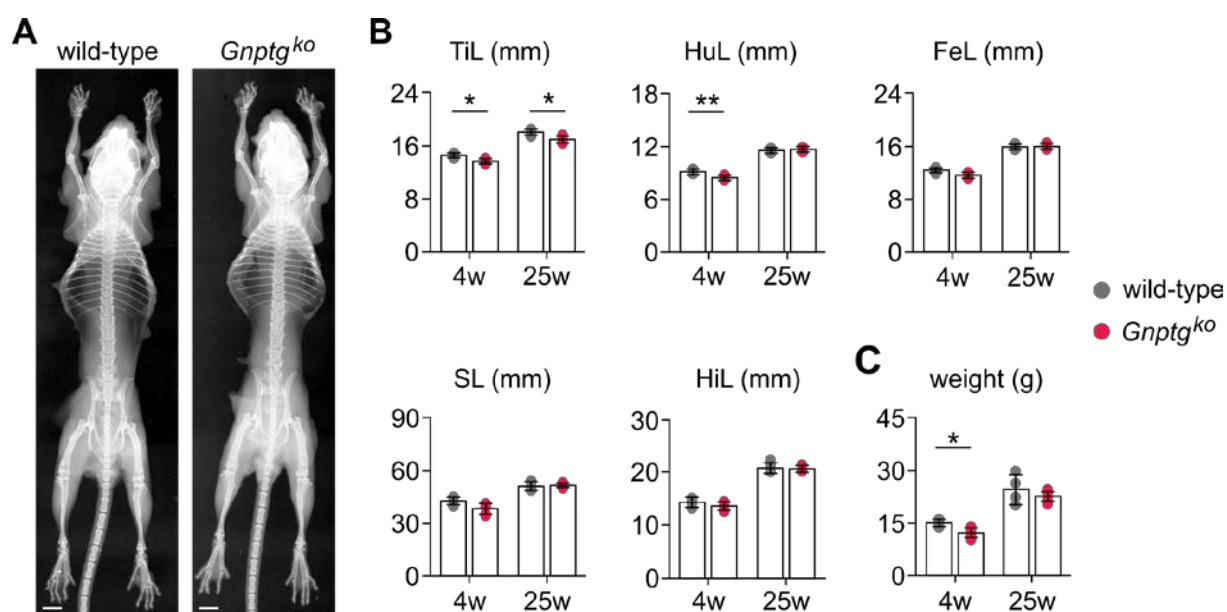

**Fig. S2. *Gnptg<sup>ko</sup>* mice display moderate growth retardation.** (A) Representative contact radiographs of whole skeletons of 25-week-old wild-type and *Gnptg<sup>ko</sup>* mice. Scale bar: 5 mm. (B) Quantification of tibia length (TiL), humerus length (HuL), femur length (FeL), spine length (SL) and hip length (HiL) of 4- and 25-weeks-old wild-type and *Gnptg<sup>ko</sup>* mice. (C) Body weight of 4- and 25-weeks-old wild-type and *Gnptg<sup>ko</sup>* mice. All data are shown as means ± SD (n ≥ 4). \**P* ≤ 0.05, \*\**P* ≤ 0.01 (unpaired two-tailed *t*-test).

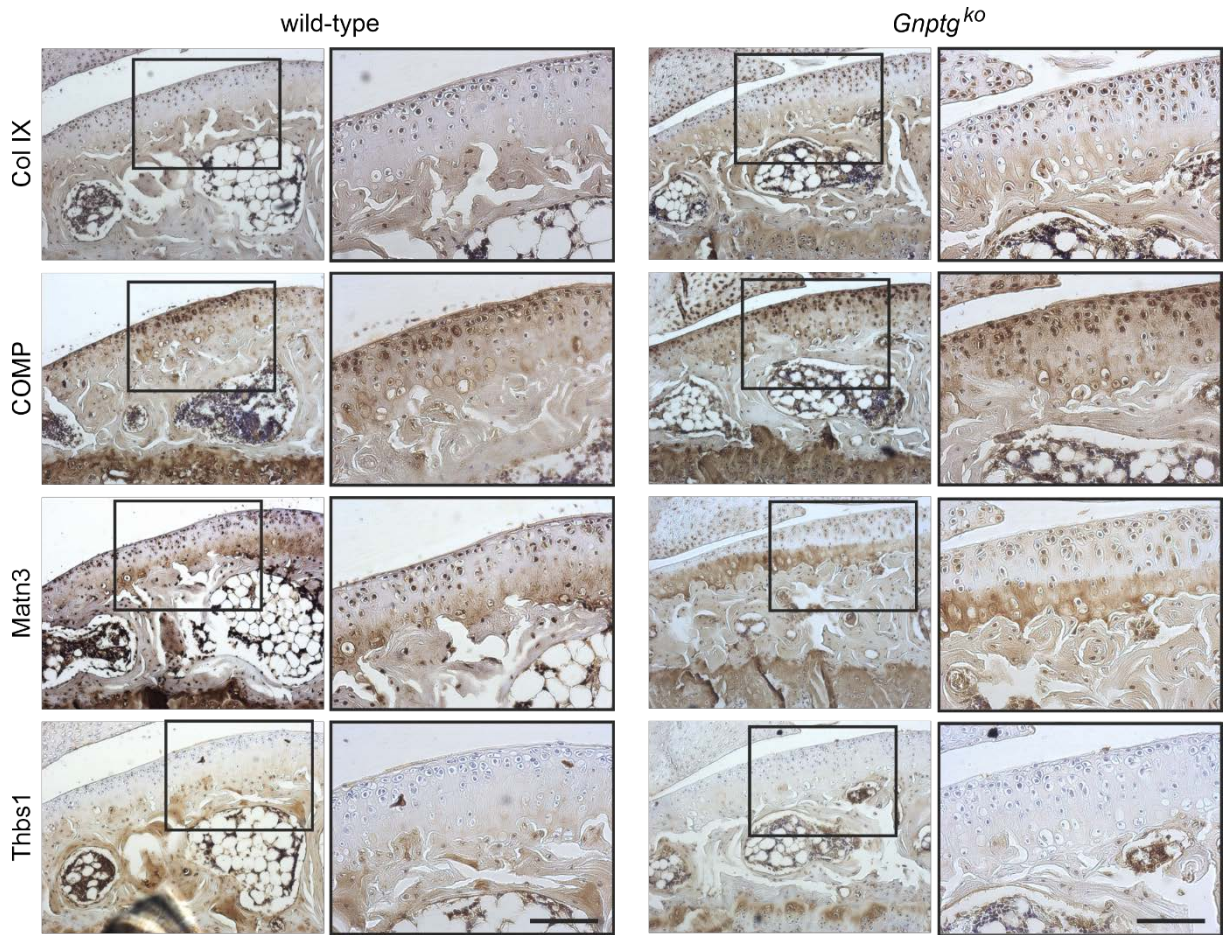

**Fig. S3. Abundance of the cartilage ECM proteins is not altered in *Gnptg<sup>ko</sup>* mice.** Immunostaining of sagittal paraffin-embedded sections of the knee joint articular cartilage from 60-weeks-old wild-type and *Gnptg<sup>ko</sup>* mice against collagen type IX (Col IX), cartilage oligomeric matrix protein/thrombospondin-5 (COMP), matrilin-3 (Matn3) and thrombospondin-1 (Thbs1). Representative images of three mice per genotype are shown. Scale bar: 100  $\mu$ m.

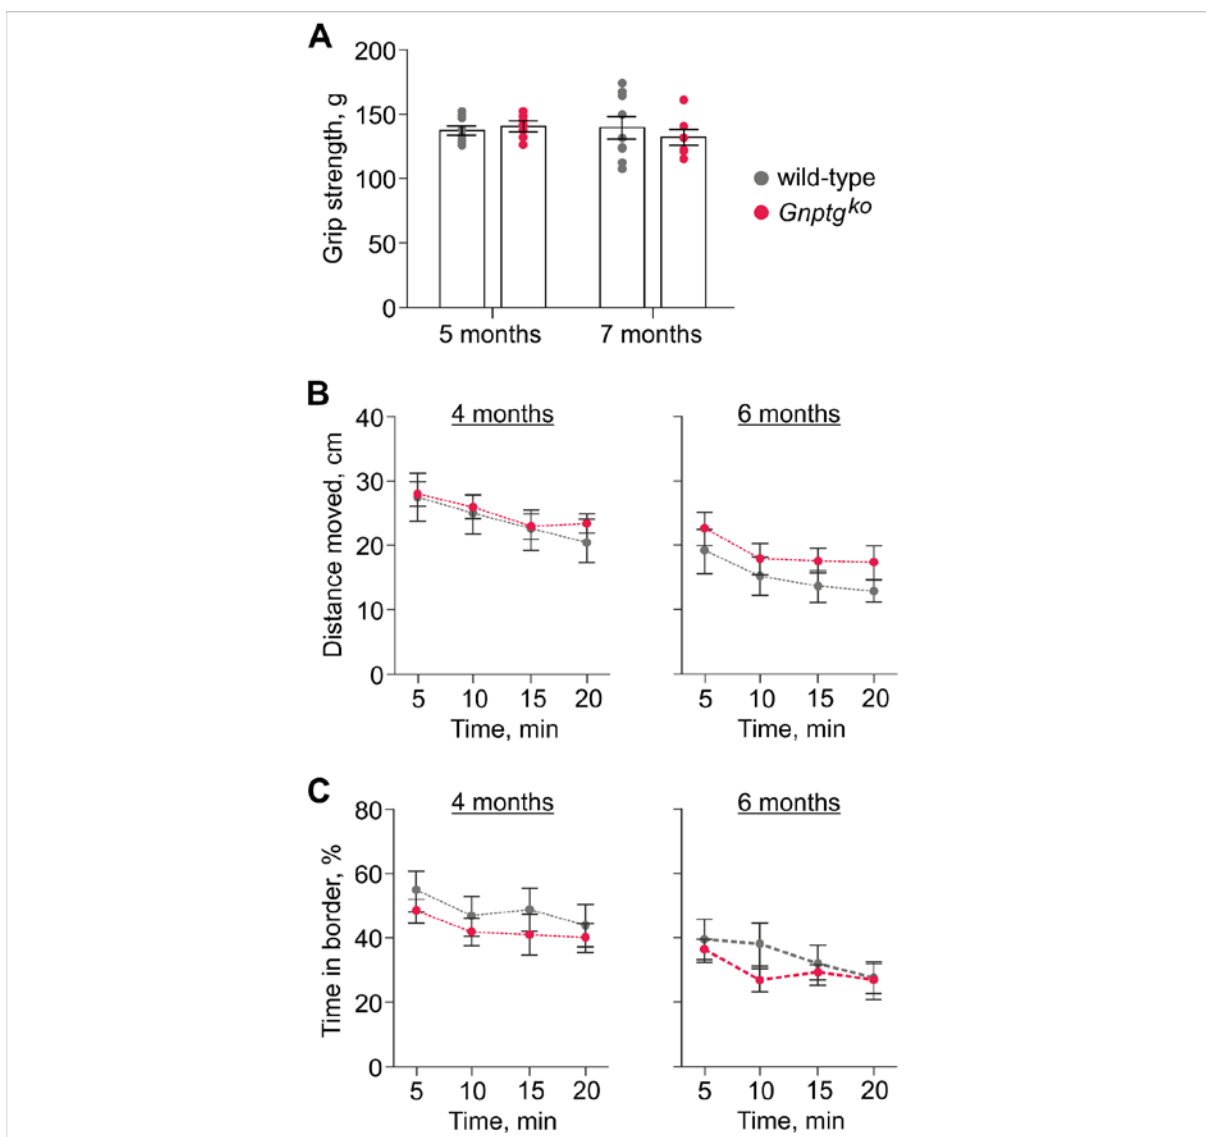

**Fig. S4. *Gnptg<sup>ko</sup>* mice display normal grip strength and behavior in the open field test.** (A) Strength of the forelimbs was measured in 5- and 7-months-old *Gnptg<sup>ko</sup>* and wild-type mice. (B, C) An open field test performed in 4- and 6-months-old *Gnptg<sup>ko</sup>* and wild-type mice to assess locomotor activity and novelty-induced behavior. Values are shown as means  $\pm$  SEM (n = 10 for wild-type, n = 7 for *Gnptg<sup>ko</sup>*).

**Table S1. Patients with MLII, MLIII alpha/beta and MLIII gamma analyzed in this study**

| Patient | Age    | Sex | Clinical diagnosis  | Molecular diagnosis                               | References                                            |
|---------|--------|-----|---------------------|---------------------------------------------------|-------------------------------------------------------|
| 1       | 33 mo  | F   | MLII                | <i>GNPTAB</i> :<br>?/? *                          | this study                                            |
| 2       | 14 mo  | M   |                     | <i>GNPTAB</i> :<br>c.3503_3504del/ c.3503_3504del | [1], [2] (patient 12 in both)                         |
| 3       | 61 mo  | M   |                     | <i>GNPTAB</i> :<br>c.3503_3504del/c.2808A>G       | [1], [2] (patient 7 in both)                          |
| 4       | 48 mo  | F   |                     | <i>GNPTAB</i> :<br>c.3503_3504del/c.1154C>T       | [1] (patient 4), [3] (patient 6),<br>[2] (patient 4)  |
| 5       | 19 yrs | M   | MLIII<br>alpha/beta | <i>GNPTAB</i> :<br>c.3503_3504del/c.1196C>T       | [1], [2] (patient 8 in both)                          |
| 6       | 14 yrs | M   |                     | <i>GNPTAB</i> :<br>c.3503_3504del/? *             | this study                                            |
| 7       | 17 yrs | F   | MLIII gamma         | <i>GNPTG</i> :<br>c.244_247dup/c.328G>T           | [4] (patient 1), [5] (patient 1),<br>[2] (patient 21) |
| 8       | 41 yrs | M   |                     | <i>GNPTG</i> :<br>c.328G>T/ c.328G>T              | [6] (patient A), [2] (patient 19)                     |
| 9       | 38 yrs | M   |                     | <i>GNPTG</i> :<br>c.328G>T/c.328G>T               | [6] (patient B), [2] (patient 20)                     |

mo, months; yrs, years;

\* Patients 1 and 6 were diagnosed clinically and biochemically as MLII and MLIII alpha/beta, respectively.

**Table S2. Joint range of motions (°) measurements in patients with MLII, MLIII alpha/beta and MLIII gamma**

| Disease  | Patient           | MLII |     |     |     | MLIII<br>alpha/beta |     | MLIII gamma |     |     | Reference<br>values |
|----------|-------------------|------|-----|-----|-----|---------------------|-----|-------------|-----|-----|---------------------|
|          |                   | 1    | 2   | 3   | 4   | 5                   | 6   | 7           | 8   | 9   |                     |
| Shoulder | flexion           | 117  | 101 | 137 | 137 | 104                 | 123 | 160         | 137 | 126 | 150 - 180           |
|          | extension         | 58   | 71  | 60  | 61  | 68                  | 33  | 66          | 67  | 68  | 50 - 60             |
|          | abduction         | 93   | 81  | 104 | 105 | 88                  | 167 | 110         | 106 | 101 | 180                 |
|          | internal rotation | 31   | 50  | 40  | 70  | 52                  | 80  | 50          | 35  | 32  | 70 - 90             |
|          | external rotation | 81   | 79  | 75  | 88  | 58                  | 77  | 70          | 53  | 40  | 90                  |
| Elbow    | flexion           | 130  | 131 | 128 | 122 | 130                 | 133 | 134         | 126 | 121 | 140 - 150           |
|          | extension         | 20   | 10  | 19  | 25  | 15                  | 6   | 0           | 39  | 49  | 0 - 10              |
| Wrist    | flexion           | 70   | 67  | 48  | 39  | 89                  | 48  | 60          | 64  | 32  | 60 - 80             |
|          | extension         | 31   | 55  | 41  | 36  | 66                  | 49  | 40          | 20  | 54  | 60 - 70             |
| Hip      | flexion           | 127  | 131 | 122 | 114 | 131                 | 106 | 125         | 70  | 99  | 100 - 120           |
|          | extension         | 11   | 19  | 11  | 18  | 14                  | 5   | 22          | 16  | 16  | 20 - 30             |
|          | abduction         | 37   | 46  | 39  | 39  | 37                  | 18  | 22          | 18  | 23  | 40                  |
|          | adduction         | 23   | 23  | 22  | 29  | 27                  | 21  | 28          | 22  | 24  | 20                  |
|          | internal rotation | 54   | 71  | 33  | 75  | 58                  | 31  | 40          | 23  | 39  | 40 - 45             |
|          | external rotation | 43   | 37  | 22  | 22  | 32                  | 37  | 30          | 15  | 21  | 45 - 50             |
| Knee     | flexion           | 136  | 132 | 118 | 131 | 137                 | ND  | 140         | 130 | 126 | 150                 |
|          | extension         | 27   | 21  | 11  | 37  | 10                  | ND  | 0           | 11  | 10  | 0 - 10              |
| Ankle    | flexion           | 37   | 19  | 30  | 43  | 10                  | 11  | ND          | 11  | 12  | 40 - 50             |
|          | dorsal extension  | 28   | 30  | 10  | 21  | 64                  | 41  | ND          | 23  | 25  | 20                  |

ND, not determined

**Table S3 (related to Fig. 2D). Expression of genes encoding lysosomal enzymes in wild-type primary chondrocytes relative to *Gapdh***

| Gene           | Protein encoded                              | $\Delta C_t$ Gene - <i>Gapdh</i> |
|----------------|----------------------------------------------|----------------------------------|
| <i>Ctsb</i>    | Cathepsin B                                  | 2.62                             |
| <i>Ctsc</i>    | Cathepsin C                                  | 3.01                             |
| <i>Ctsl</i>    | Cathepsin L                                  | 3.03                             |
| <i>Ctsd</i>    | Cathepsin D                                  | 3.23                             |
| <i>Ctsz</i>    | Cathepsin Z                                  | 3.24                             |
| <i>Ctsk</i>    | Cathepsin K                                  | 5.65                             |
| <i>Cln5</i>    | Ceroid-lipofuscinosis neuronal protein 5     | 5.66                             |
| <i>Tpp1</i>    | Tripeptidyl-peptidase 1                      | 6.03                             |
| <i>Aga</i>     | $\beta$ -N-acetylglucosaminyl-L-asparaginase | 6.08                             |
| <i>Gba</i>     | Lysosomal acid glucosylceramidase            | 6.20                             |
| <i>Ctss</i>    | Cathepsin S                                  | 6.56                             |
| <i>Neu1</i>    | Sialidase-1                                  | 6.78                             |
| <i>Asah1</i>   | Acid ceramidase                              | 6.90                             |
| <i>Arsa</i>    | Arylsulfatase A                              | 7.06                             |
| <i>Plbd2</i>   | Putative phospholipase B-like 2              | 7.24                             |
| <i>Gusb</i>    | $\beta$ -Glucuronidase                       | 7.34                             |
| <i>Fuca1</i>   | $\alpha$ -L-fucosidase                       | 8.21                             |
| <i>Arsb</i>    | Arylsulfatase B                              | 8.23                             |
| <i>Ppt2</i>    | Lysosomal thioesterase PPT2                  | 8.56                             |
| <i>Ppt1</i>    | Palmitoyl-protein thioesterase 1             | 8.67                             |
| <i>Pla2g15</i> | Phospholipase A2 group XV                    | 9.12                             |
| <i>Hexb</i>    | $\beta$ -Hexosaminidase                      | 9.33                             |
| <i>Glb1</i>    | $\beta$ -Galactosidase                       | 9.41                             |
| <i>Lipa</i>    | Lysosomal acid lipase                        | 9.52                             |
| <i>Man2b1</i>  | Lysosomal $\alpha$ -mannosidase              | 9.67                             |
| <i>Acp2</i>    | Lysosomal acid phosphatase                   | 9.81                             |
| <i>Galns</i>   | N-acetylgalactosamine-6-sulfatase            | 10.01                            |
| <i>Prep</i>    | Lysosomal Pro-X carboxypeptidase             | 10.21                            |
| <i>Hyal1</i>   | Hyaluronidase-1                              | 10.43                            |
| <i>Idua</i>    | $\alpha$ -L-Iduronidase                      | 10.55                            |
| <i>Dpp7</i>    | Dipeptidyl peptidase 2                       | 10.68                            |
| <i>Ggh</i>     | $\gamma$ -Glutamyl hydrolase                 | 10.83                            |
| <i>Siae</i>    | Sialate O-acetyltransferase                  | 10.93                            |
| <i>Manba</i>   | $\beta$ -Mannosidase                         | 10.99                            |
| <i>Acp5</i>    | Lysosomal acid phosphatase 5                 | 11.07                            |
| <i>Arsk</i>    | Arylsulfatase K                              | 11.20                            |

**Table S4 (related to Fig. 2H). Relative gene expression of chondrocyte markers in wild-type and *Gnptg*<sup>ko</sup> primary chondrocytes.**

| Gene           | Protein encoded                         | Wild-type   | <i>Gnptg</i> <sup>ko</sup> |
|----------------|-----------------------------------------|-------------|----------------------------|
| <i>Acan</i>    | Aggrecan                                | 1.01 ± 0.03 | 0.49 ± 0.19                |
| <i>Bgn</i>     | Biglycan                                | 1.03 ± 0.05 | 0.58 ± 0.02                |
| <i>Dcn</i>     | Decorin                                 | 1.05 ± 0.03 | 0.62 ± 0.06                |
| <i>Fnl</i>     | Fibronectin                             | 1.01 ± 0.04 | 0.34 ± 0.05                |
| <i>Col2a1</i>  | Collagen α1(II) chain                   | 1.02 ± 0.06 | 0.20 ± 0.03                |
| <i>Col9a1</i>  | Collagen α1(IX) chain                   | 1.02 ± 0.09 | 0.26 ± 0.04                |
| <i>Col10a1</i> | Collagen α1(X) chain                    | 1.01 ± 0.09 | 0.35 ± 0.01                |
| <i>Gnptg</i>   | γ-subunit GlcNAc-1-phosphotransferase   | 1.02 ± 0.04 | 0.14 ± 0.01                |
| <i>Gnptab</i>  | α/β-subunit GlcNAc-1-phosphotransferase | 1.01 ± 0.05 | 1.01 ± 0.03                |

## References

- [1] G.K. Cury, U. Matte, O. Artigalás, T. Alegria, R.V. Velho, F. Sperb, M.G. Burin, E.M. Ribeiro, C.M. Lourenço, C.A. Kim, E.R. Valadares, M.F. Galera, A.X. Acosta, I.V.D. Schwartz, Mucopolipidosis II and III alpha/beta in Brazil: Analysis of the GNPTAB gene, *Gene*. 524 (2013) 59–64. <https://doi.org/10.1016/J.GENE.2013.03.105>.
- [2] T. Alegria, F. Sperb-Ludwig, N.R. Guarany, E.M. Ribeiro, C.M. Lourenço, C.A. Kim, E.R. Valadares, M.F. Galera, A.X. Acosta, D.D.G. Horovitz, I.V.D. Schwartz, Clinical Characterization of Mucopolipidoses II and III: A Multicenter Study, *J Pediatr Genet*. 08 (2019) 198–204. <https://doi.org/10.1055/s-0039-1697605>.
- [3] N.F. Ludwig, R.V. Velho, F. Sperb-Ludwig, A.X. Acosta, E.M. Ribeiro, C.A. Kim, D.D. Gandelman Horovitz, R. Boy, M.J. Rodovalho-Doriqui, C.M. Lourenço, E.S. Santos, T. Bräulke, S. Pohl, I.V.D. Schwartz, GNPTAB missense mutations cause loss of GlcNAc-1-phosphotransferase activity in mucopolipidosis type II through distinct mechanisms, *Int. J. Biochem. Cell Biol.* 92 (2017) 90–94. <https://doi.org/10.1016/j.biocel.2017.09.006>.
- [4] R.V. Velho, T. Alegria, F. Sperb, N.F. Ludwig, M.L. Saraiva-Pereira, U. Matte, I. V.D. Schwartz, A de novo or germline mutation in a family with Mucopolipidosis III gamma: Implications for molecular diagnosis and genetic counseling, *Mol. Genet. Metab. Reports*. 1 (2014) 98–102. <https://doi.org/10.1016/J.YMGMR.2014.01.002>.
- [5] N.F. Ludwig, F. Sperb-Ludwig, R.V. Velho, I.V.D. Schwartz, Next-generation sequencing corroborates a probable de novo GNPTG variation previously detected by Sanger sequencing, *Mol. Genet. Metab. Reports*. 11 (2017) 92–93. <https://doi.org/10.1016/j.ymgmr.2017.02.002>.
- [6] R.V. Velho, N.F. Ludwig, T. Alegria, F. Sperb-Ludwig, N.R. Guarany, U. Matte, I. V.D. Schwartz, Enigmatic in vivo GlcNAc-1-phosphotransferase (GNPTG) transcript correction to wild type in two mucopolipidosis III gamma siblings homozygous for nonsense mutations, *J. Hum. Genet.* 61 (2016) 555–560. <https://doi.org/10.1038/jhg.2016.13>.
